# Supplementary material for: Theoretical prediction of the carrier mobilities for MII2MIII-Cl-layered double hydroxides in three-dimensional directions
Source: Royal Society of Chemistry journal article supplement (doi:10.1039/d2tc00959e), 2022-01-01
Supplement: d2tc00959e1.pdf [file d2tc00959e1.pdf]

1 Electronic Supplementary Information for  
2 Theoretical Prediction of the Carrier  
3 Mobilities for  $M^{II}_2M^{III}-Cl$ -Layered Double  
4 Hydroxides in the Three-Dimensional  
5 Directions

6 Si-Min Xu,<sup>‡\*a</sup> Yu-Quan Zhu,<sup>‡a</sup> Zi-Ru Chen,<sup>\*a</sup> Jiang-Rong Yang,<sup>a</sup> Xudong Chen<sup>\*b</sup>  
7 and Hong Yan<sup>a</sup>

8 <sup>a</sup> State Key Laboratory of Chemical Resource Engineering, Beijing University of  
9 Chemical Technology, Beijing 100029, P. R. China.

10 <sup>b</sup> Key Laboratory of Weak Light Nonlinear Photonics, Ministry of Education, School  
11 of Physics, Nankai University, Tianjin 300071, P. R. China.

12 <sup>‡</sup> S.-M. Xu, and Y.-Q. Zhu contributed equally to this work.

13 Corresponding authors

14 [2019210630@mail.buct.edu.cn](mailto:2019210630@mail.buct.edu.cn) (Z.-R. Chen),

15 [chenxd@email.tjut.edu.cn](mailto:chenxd@email.tjut.edu.cn) (X. Chen),

16 [xsm713@sina.com](mailto:xsm713@sina.com), [Si-MinXu@mail.buct.edu.cn](mailto:Si-MinXu@mail.buct.edu.cn) (S.-M. Xu).

## Contents

| Item                   | Title                                                                                                                                                                                          | Pagination |
|------------------------|------------------------------------------------------------------------------------------------------------------------------------------------------------------------------------------------|------------|
| Supplementary Table 1  | Band Gap Energy, Work Function, and Band Edge Placements of $M^{II}_2M^{III}-Cl-LDHs$ under Lattice Dilation and Compression in $x$ and $y$ Directions                                         | 1          |
| Supplementary Table 2  | Transfer Integrals, Reorganization Energies, Gibbs Free Energy Changes, Transfer Rates, and Carrier Mobilities for $[Mg_2Ga(OH)_6(OH_2)_7]^+$ using Different Exchange-Correlation Functionals | 3          |
| Supplementary Table 3  | Transfer Integrals, Reorganization Energies, Gibbs Free Energy Changes, Transfer Rates, and Carrier Mobilities for $Mg_2Ga-Cl-LDH$ Matrix Clusters with Different Sizes                        | 4          |
| Supplementary Figure 1 | Phonon dispersion curves of $M^{II}_2M^{III}-Cl-LDHs$                                                                                                                                          | 5          |
| Supplementary Figure 2 | Band structures of $Mg_2Fe-Cl-LDH$ , $Ni_2Fe-Cl-LDH$ , $Ni_2Ga-Cl-LDH$ , and $Zn_2Fe-Cl-LDH$ without the Hubbard correction                                                                    | 6          |
| Supplementary Figure 3 | Linear fitting of the conduction band minimum and valence band maximum shift with respect to the lattice dilation and compression in the $y$ direction for $M^{II}_2M^{III}-Cl-LDHs$           | 7          |

**Table S1.** Band Gap Energies ( $E_g$ ), Work Functions ( $W$ ), Valence Band Maximum ( $E_{\text{VBM}}$ ), and Conduction Band Minimum ( $E_{\text{CBM}}$ ) of  $\text{Mg}_2\text{Fe-Cl-LDH}$ ,  $\text{Mg}_2\text{Ga-Cl-LDH}$ ,  $\text{Ni}_2\text{Fe-Cl-LDH}$ ,  $\text{Ni}_2\text{Ga-Cl-LDH}$ ,  $\text{Zn}_2\text{Fe-Cl-LDH}$ , and  $\text{Zn}_2\text{Ga-Cl-LDH}$  under Lattice Dilation and Compression in  $x$  and  $y$  Directions

| model                         | direction | $\Delta l / l_0$ | $E_g$<br>(eV) | $W$<br>(eV) | $E_{\text{VBM}}$<br>(eV) | $E_{\text{CBM}}$<br>(eV) |
|-------------------------------|-----------|------------------|---------------|-------------|--------------------------|--------------------------|
| $\text{Mg}_2\text{Fe-Cl-LDH}$ | $x$       | -1%              | 1.819         | 4.685       | -5.459                   | -3.637                   |
|                               |           | -0.5%            | 1.823         | 4.548       | -5.529                   | -3.709                   |
|                               |           | 0%               | 1.832         | 4.753       | -5.695                   | -3.775                   |
|                               |           | 0.5%             | 1.879         | 4.589       | -5.769                   | -3.887                   |
|                               |           | 1%               | 1.889         | 4.919       | -5.864                   | -3.974                   |
|                               | $y$       | -1%              | 1.791         | 4.672       | -5.631                   | -3.819                   |
|                               |           | -0.5%            | 1.800         | 4.613       | -5.567                   | -3.777                   |
|                               |           | 0%               | 1.812         | 4.725       | -5.537                   | -3.713                   |
|                               |           | 0.5%             | 1.827         | 4.553       | -5.513                   | -3.671                   |
|                               |           | 1%               | 1.827         | 4.624       | -5.466                   | -3.640                   |
| $\text{Mg}_2\text{Ga-Cl-LDH}$ | $x$       | -1%              | 4.169         | 4.753       | -4.844                   | -0.885                   |
|                               |           | -0.5%            | 4.159         | 4.764       | -4.838                   | -0.878                   |
|                               |           | 0%               | 4.146         | 4.729       | -4.802                   | -0.868                   |
|                               |           | 0.5%             | 4.127         | 4.728       | -4.792                   | -0.865                   |
|                               |           | 1%               | 4.116         | 4.726       | -4.784                   | -0.856                   |
|                               | $y$       | -1%              | 4.167         | 4.759       | -4.843                   | -0.876                   |
|                               |           | -0.5%            | 4.143         | 4.749       | -4.820                   | -0.878                   |
|                               |           | 0%               | 4.125         | 4.742       | -4.804                   | -0.879                   |
|                               |           | 0.5%             | 4.097         | 4.739       | -4.788                   | -0.882                   |
|                               |           | 1%               | 4.075         | 4.717       | -4.755                   | -0.891                   |
| $\text{Ni}_2\text{Fe-Cl-LDH}$ | $x$       | -1%              | 1.910         | 4.660       | -5.615                   | -3.421                   |
|                               |           | -0.5%            | 1.887         | 4.433       | -5.499                   | -3.489                   |
|                               |           | 0%               | 1.875         | 4.359       | -5.407                   | -3.605                   |
|                               |           | 0.5%             | 1.859         | 4.669       | -5.377                   | -3.639                   |
|                               |           | 1%               | 1.843         | 4.665       | -5.297                   | -3.743                   |
|                               | $y$       | -1%              | 1.695         | 4.684       | -5.531                   | -3.837                   |
|                               |           | -0.5%            | 1.695         | 4.631       | -5.478                   | -3.784                   |
|                               |           | 0%               | 1.669         | 4.487       | -5.421                   | -3.703                   |
|                               |           | 0.5%             | 1.662         | 4.459       | -5.361                   | -3.653                   |
|                               |           | 1%               | 1.638         | 4.482       | -5.290                   | -3.628                   |
| $\text{Ni}_2\text{Ga-Cl-LDH}$ | $x$       | -1%              | 2.554         | 4.746       | -6.024                   | -4.169                   |
|                               |           | -0.5%            | 2.556         | 4.746       | -5.973                   | -4.108                   |
|                               |           | 0%               | 2.571         | 4.556       | -5.941                   | -4.071                   |
|                               |           | 0.5%             | 2.572         | 4.554       | -5.860                   | -4.008                   |

|                           |          |       |       |       |        |        |
|---------------------------|----------|-------|-------|-------|--------|--------|
|                           |          | 1%    | 2.573 | 4.542 | -5.829 | -3.955 |
|                           |          | -1%   | 2.531 | 4.598 | -6.286 | -4.048 |
|                           |          | -0.5% | 2.545 | 4.576 | -6.273 | -4.033 |
|                           | <i>y</i> | 0%    | 2.545 | 4.576 | -6.261 | -4.024 |
|                           |          | 0.5%  | 2.538 | 4.617 | -6.259 | -4.014 |
|                           |          | 1%    | 2.547 | 4.578 | -6.248 | -4.005 |
|                           |          | -1%   | 2.187 | 4.724 | -5.818 | -3.630 |
|                           |          | -0.5% | 2.176 | 4.763 | -5.839 | -3.645 |
|                           | <i>x</i> | 0%    | 2.197 | 4.772 | -5.851 | -3.653 |
|                           |          | 0.5%  | 2.184 | 4.747 | -5.861 | -3.665 |
|                           |          | 1%    | 2.174 | 4.764 | -5.871 | -3.677 |
| Zn <sub>2</sub> Fe-Cl-LDH |          | -1%   | 1.485 | 4.696 | -5.399 | -4.003 |
|                           |          | -0.5% | 1.355 | 4.747 | -5.424 | -4.025 |
|                           | <i>y</i> | 0%    | 1.375 | 4.712 | -5.439 | -4.070 |
|                           |          | 0.5%  | 1.390 | 4.789 | -5.466 | -4.070 |
|                           |          | 1%    | 1.396 | 4.768 | -5.484 | -4.094 |
|                           |          | -1%   | 3.131 | 4.813 | -4.879 | -1.518 |
|                           |          | -0.5% | 3.135 | 4.793 | -4.861 | -1.547 |
|                           | <i>x</i> | 0%    | 3.093 | 4.798 | -4.852 | -1.536 |
|                           |          | 0.5%  | 3.131 | 4.785 | -4.850 | -1.520 |
|                           |          | 1%    | 3.132 | 4.786 | -4.844 | -1.520 |
| Zn <sub>2</sub> Ga-Cl-LDH |          | -1%   | 3.109 | 4.803 | -4.857 | -1.549 |
|                           |          | -0.5% | 3.118 | 4.797 | -4.856 | -1.538 |
|                           | <i>y</i> | 0%    | 3.116 | 4.788 | -4.846 | -1.535 |
|                           |          | 0.5%  | 3.111 | 4.790 | -4.845 | -1.530 |
|                           |          | 1%    | 3.109 | 4.783 | -4.838 | -1.528 |

---

**Table S2.** Transfer Integral  $V$ , Reorganization Energy  $\lambda$ , Gibbs Free Energy Change  $\Delta G$ , Transfer Rate  $k$ , and Carrier Mobility  $\mu$  for  $[\text{Mg}_2\text{Ga}(\text{OH})_6(\text{OH}_2)_7]^+$  Using Different Exchange-Correlation Functionals

| exchange-correlation functional | charge carrier | $V$ (eV) | $\lambda$ (eV) | $\Delta G$ (eV) | $k$ ( $\text{s}^{-1}$ ) | $\mu$ ( $\text{cm}^2 \cdot \text{V}^{-1} \cdot \text{s}^{-1}$ ) |
|---------------------------------|----------------|----------|----------------|-----------------|-------------------------|-----------------------------------------------------------------|
| B3LYP                           | e<br>h         | 0.049    | 2.20           | 6.54            | $4 \times 10^{-133}$    | $5 \times 10^{-164}$                                            |
| M06                             | e<br>h         | 0.030    | 2.30           | 4.56            | $2 \times 10^{-73}$     | $2 \times 10^{-104}$                                            |
| PBE                             | e<br>h         | 0.088    | 2.61           | 3.75            | $6 \times 10^{-52}$     | $9 \times 10^{-83}$                                             |

**Table S3.** Transfer Integrals  $V$ , Reorganization Energies  $\lambda$ , Gibbs Free Energy Changes  $\Delta G$ , Transfer Rates  $k$ , and Carrier Mobilities  $\mu$  for Carrier Transportation in Mg<sub>2</sub>Ga-Cl-LDH Matrix Clusters with Different Sizes

| chemical formula                                                                               | charge carrier | $V$ (eV) | $\lambda$ (eV) | $\Delta G$ (eV) | $k$ (s <sup>-1</sup> ) | $\mu$ (cm <sup>2</sup> ·V <sup>-1</sup> ·s <sup>-1</sup> ) |
|------------------------------------------------------------------------------------------------|----------------|----------|----------------|-----------------|------------------------|------------------------------------------------------------|
| [Mg <sub>2</sub> Al(OH) <sub>6</sub> (OH <sub>2</sub> ) <sub>7</sub> ]·Cl                      | e<br>h         | 0.049    | 2.20           | 6.54            | $4 \times 10^{-133}$   | $5 \times 10^{-164}$                                       |
| [Mg <sub>4</sub> Al <sub>2</sub> (OH) <sub>12</sub> (OH <sub>2</sub> ) <sub>10</sub> ]·2C<br>1 | e<br>h         | 0.693    | 1.75           | 3.44            | $1 \times 10^{-49}$    | $2 \times 10^{-80}$                                        |
| [Mg <sub>6</sub> Al <sub>3</sub> (OH) <sub>18</sub> (OH <sub>2</sub> ) <sub>12</sub> ]·3C<br>1 | e<br>h         | 0.715    | 3.27           | 3.18            | $2 \times 10^{-38}$    | $2 \times 10^{-69}$                                        |

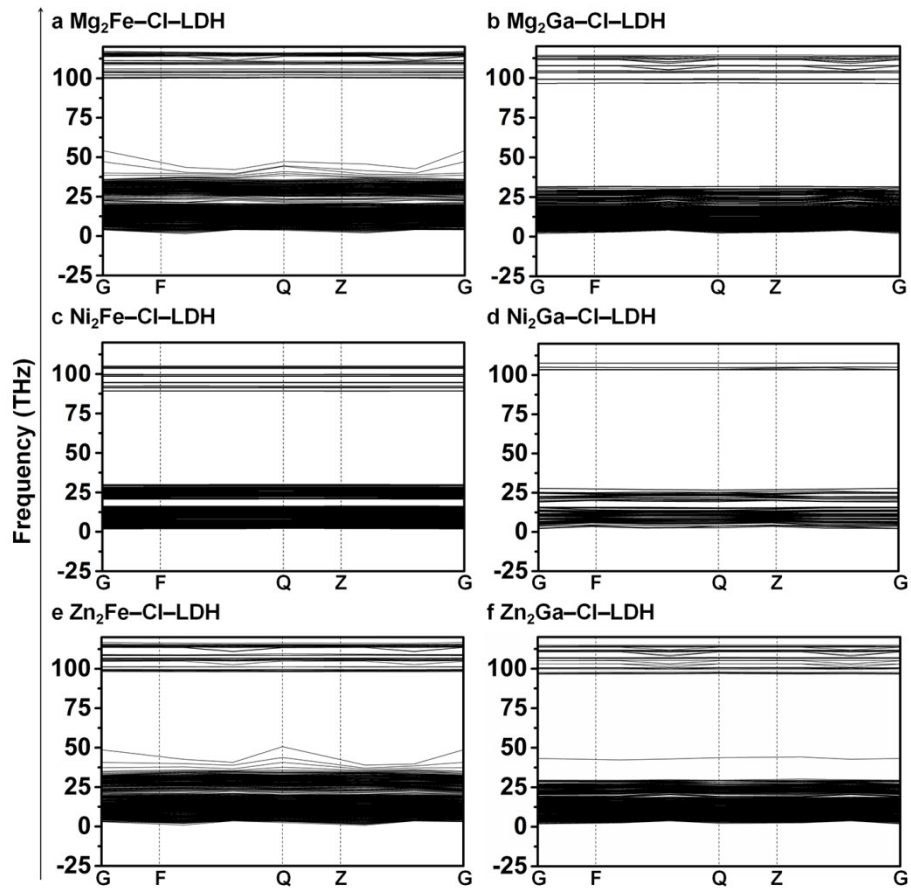

**Figure S1.** Phonon dispersion curves of (a)  $\text{Mg}_2\text{Fe}-\text{Cl}-\text{LDH}$ , (b)  $\text{Mg}_2\text{Ga}-\text{Cl}-\text{LDH}$ , (c)  $\text{Ni}_2\text{Fe}-\text{Cl}-\text{LDH}$ , (d)  $\text{Ni}_2\text{Ga}-\text{Cl}-\text{LDH}$ , (e)  $\text{Zn}_2\text{Fe}-\text{Cl}-\text{LDH}$ , and (f)  $\text{Zn}_2\text{Ga}-\text{Cl}-\text{LDH}$ , respectively.

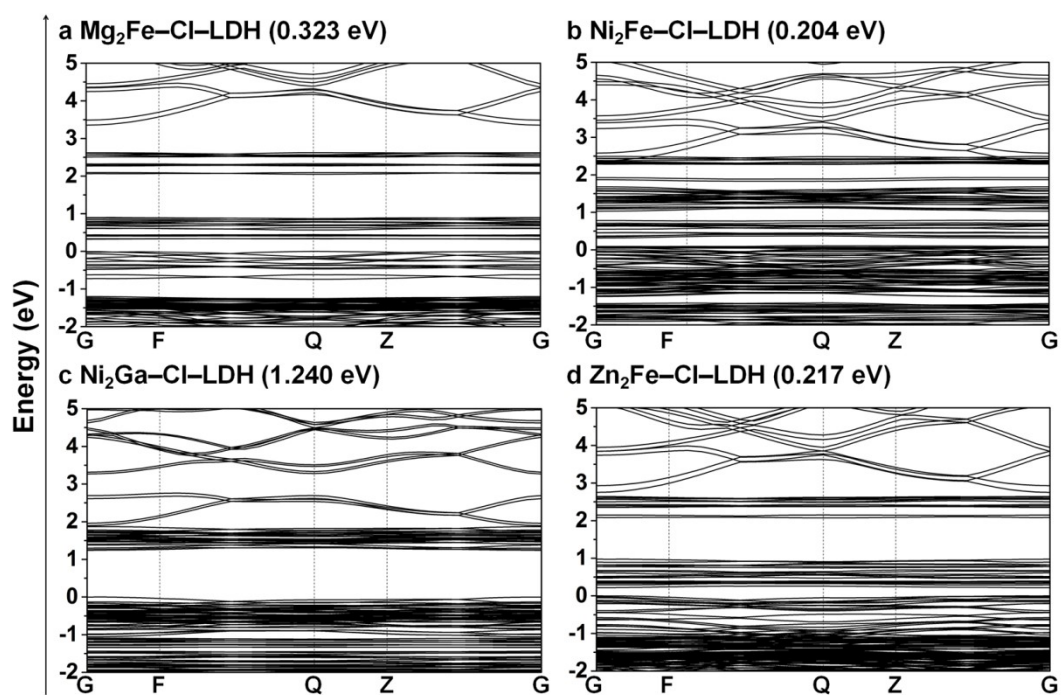

**Figure S2.** Band structures of  $\text{Mg}_2\text{Fe-Cl-LDH}$ ,  $\text{Ni}_2\text{Fe-Cl-LDH}$ ,  $\text{Ni}_2\text{Ga-Cl-LDH}$ , and  $\text{Zn}_2\text{Fe-Cl-LDH}$  without the Hubbard correction. The band gap energy of each LDH is listed in the bracket.



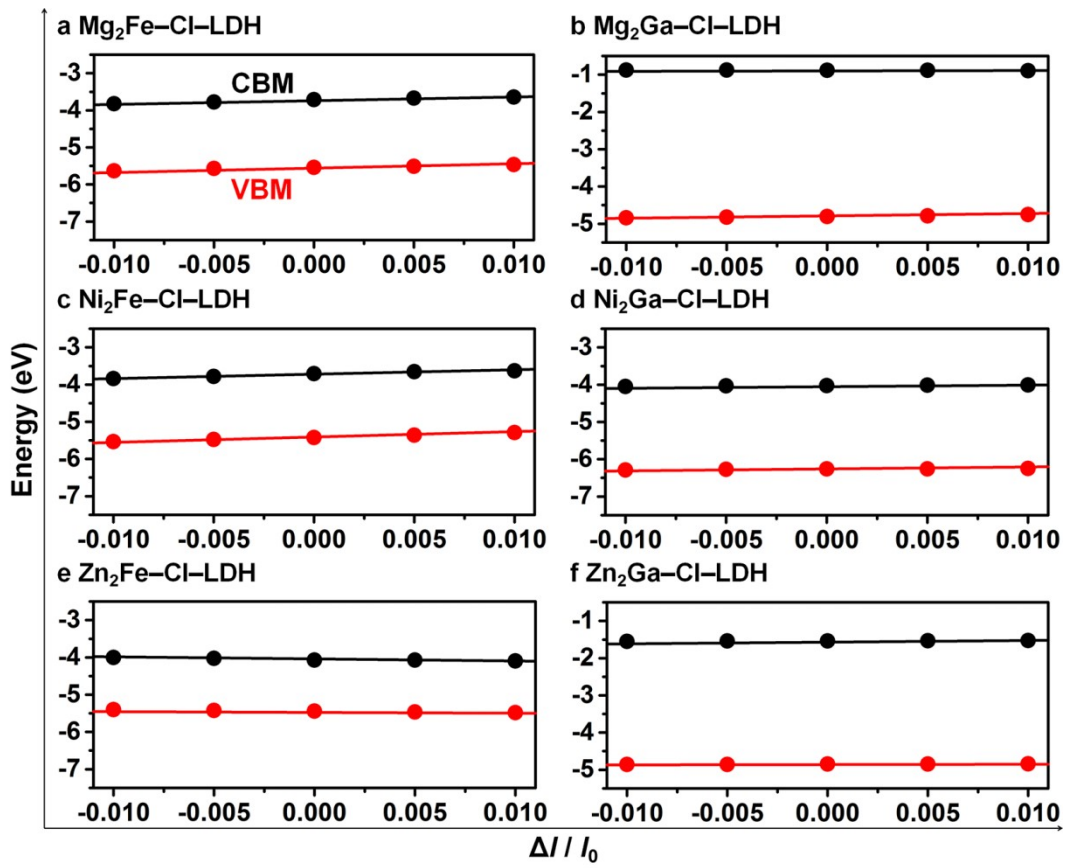

**Figure S3.** Linear fitting of the conduction band minimum and valence band maximum shift ( $\Delta\nu$ ) with respect to the lattice dilation and compression ( $\Delta/l_0$ ) in the  $y$  direction for (a) Mg<sub>2</sub>Fe-Cl-LDH, (b) Mg<sub>2</sub>Ga-Cl-LDH, (c) Ni<sub>2</sub>Fe-Cl-LDH, (d) Ni<sub>2</sub>Ga-Cl-LDH, (e) Zn<sub>2</sub>Fe-Cl-LDH, and (f) Zn<sub>2</sub>Ga-Cl-LDH, respectively.
